# Supplementary material
Source: PubMed Central journal article supplement (PMC9822548)
Supplement: mmc1.pdf [file mmc1.pdf]

**Regdanvimab for patients with mild-to-moderate COVID-19: a retrospective cohort study and subgroup analysis of patients with the Delta variant**

Young Rock Jang MD<sup>a</sup>, Yoon Ju Oh<sup>b</sup>, Jin Yong Kim MD<sup>a</sup>

<sup>a</sup>Division of Infectious Diseases, Department of Internal Medicine, Incheon Medical Center, Republic of Korea

<sup>b</sup>Division of Metabolism and Endocrinology, Department of Internal Medicine, Incheon Medical Center, Incheon, Republic of Korea

**Supplementary Materials**

**Table S1.** Number of patients eligible or ineligible for inclusion and receiving regdanvimab or SoC before and after 5 February, 2021 (date of conditional approval of regdanvimab in Korea); with reasons for exclusion shown.

|                                                                                   | <b>Before regdanvimab<br/>conditional approval<br/>(Sep 2020 – 4 Feb 2021)</b> | <b>After regdanvimab<br/>conditional approval<br/>(5 Feb 2021 – Oct 2021)</b> | <b>Total</b> |
|-----------------------------------------------------------------------------------|--------------------------------------------------------------------------------|-------------------------------------------------------------------------------|--------------|
| Hospitalized patients with confirmed COVID-19                                     | 180                                                                            | 620                                                                           | 800          |
| Excluded from the study, n                                                        | 0                                                                              | 78                                                                            | 78           |
| Mild COVID-19 without high-risk factors for progression                           | 0                                                                              | 7                                                                             | 7            |
| Administered Regdanvimab >7 days after symptom onset<br>(regdanvimab cohort only) | N/A                                                                            | 4                                                                             | 4            |
| Severe COVID-19                                                                   | 0                                                                              | 67                                                                            | 67           |
| Eligible for study                                                                | 180                                                                            | 542                                                                           | 722          |
| Hospitalized patients in the regdanvimab cohort, n                                | N/A                                                                            | 438                                                                           | 438          |
| Excluded from the study, n                                                        | N/A                                                                            | 20                                                                            | 20           |
| Mild COVID-19 without high-risk factors for progression                           | N/A                                                                            | 7                                                                             | 7            |
| Administered Regdanvimab >7 days after symptom onset<br>(regdanvimab cohort only) | N/A                                                                            | 4                                                                             | 4            |
| Severe COVID-19                                                                   | N/A                                                                            | 9                                                                             | 9            |
| Eligible for inclusion (regdanvimab cohort)                                       | N/A                                                                            | 418                                                                           | 418          |

|                                                         |     |     |     |
|---------------------------------------------------------|-----|-----|-----|
| Hospitalized patients in the SoC cohort, n              | 180 | 182 | 362 |
| Excluded from the study, n                              | 0   | 58  | 58  |
| Mild COVID-19 without high-risk factors for progression | 0   | 0   | 0   |
| Severe COVID-19                                         | 0   | 58  | 58  |
| Eligible for inclusion (SoC cohort)                     | 180 | 124 | 304 |

Data are n, unless otherwise specified.

COVID-19; coronavirus disease 2019; N/A, not applicable SoC, standard of care

**Table S2.** Proportion of unvaccinated patients who deteriorated to SpO<sub>2</sub> <90% in room air, required supplemental oxygen therapy above high flow, or experienced mortality due to COVID-19 up to Day 28 (primary efficacy endpoint), by cohort and Delta variant status

|                        | <b>Regdanvimab</b> | <b>SoC</b>    | <b>% difference (95% CI) [P-value]<sup>a,b</sup></b> |
|------------------------|--------------------|---------------|------------------------------------------------------|
| Unvaccinated cohort    | 12/297 (4.0)       | 30/275 (10.9) | -6.9 (-11.6, -2.0) [0.0020]                          |
| Delta variant subgroup | 7/177 (4.0)        | 8/86 (9.3)    | -5.3 (-13.9, 0.9) [0.0929]                           |

Data are n (%), unless otherwise specified.

<sup>a</sup>Farrington and Manning method used to calculate the 95% exact CI for the proportion difference between regdanvimab and SoC cohort in each group.

<sup>b</sup>P-values were derived from Fisher exact test.

CI, confidence interval; COVID-19; coronavirus disease 2019; SoC, standard of care; SpO<sub>2</sub>, peripheral oxygen

**Table S3.** Logistic regression model for the proportion of patients who deteriorated to SpO<sub>2</sub> <90% in room air, required supplemental oxygen therapy above high flow, or experienced mortality due to COVID-19 up to Day 28 (primary efficacy endpoint) in the delta variant vs non delta variant subgroups

|                                             |                    | <b>Logistic regression model<sup>b</sup></b>               |
|---------------------------------------------|--------------------|------------------------------------------------------------|
|                                             | <b>Regdanvimab</b> | <b>Odds ratio (95% CI)</b><br><b>[P-value]<sup>c</sup></b> |
| Delta variant                               | 8/297 (2.7)        | 0.5327 (0.0789, 3.5962) [0.5181]                           |
| Non-delta variant or wild type <sup>a</sup> | 3/35 (8.6)         |                                                            |

Data are n (%), unless otherwise specified.

<sup>a</sup>Patients with unknown variant data (n=86) may have included delta variant or others, so were excluded from this analysis.

<sup>b</sup>Logistic regression model with treatment as a fixed effect and age, BMI, at least one high risk factor and at least one COVID-19 vaccine as covariates.

<sup>c</sup>P-value is calculated on treatment effect from the logistic model.

**Table S4.** Secondary efficacy endpoints in unvaccinated individuals according to treatment and Delta variant status

|                                                                         | <b>Overall<br/>regdanvimab<br/><br/>n=297</b> | <b>Overall<br/>SoC<br/><br/>n=275</b> | <b>P-value<sup>a</sup></b> | <b>Delta variant<br/>subgroup<br/>regdanvimab<br/><br/>n=117</b> | <b>Delta variant<br/>subgroup<br/>SoC<br/><br/>n=86</b> | <b>P-value<sup>a</sup></b> |
|-------------------------------------------------------------------------|-----------------------------------------------|---------------------------------------|----------------------------|------------------------------------------------------------------|---------------------------------------------------------|----------------------------|
| Patients with SpO <sub>2</sub> deterioration to <94% in room air, n (%) | 24 (8.1)                                      | 85 (30.9)                             | <0.0001                    | 11 (6.2)                                                         | 11 (12.8)                                               | 0.0708                     |
| Patients with SpO <sub>2</sub> deterioration to <90% in room air, n (%) | 4 (1.3)                                       | 24 (8.7)                              | <0.0001                    | 2 (1.1)                                                          | 4 (4.7)                                                 | 0.0915 <sup>b</sup>        |
| Patients requiring low-flow oxygen therapy, n (%)                       | 70 (23.6)                                     | 126 (45.8)                            | <0.0001                    | 44 (24.9)                                                        | 28 (32.6)                                               | 0.1890                     |
| Patients requiring high-flow oxygen therapy, n (%)                      | 9 (3.0)                                       | 13 (4.7)                              | 0.2917                     | 5 (2.8)                                                          | 6 (7.0)                                                 | 0.1850 <sup>b</sup>        |
| Patients requiring mechanical ventilation, n (%)                        | 0                                             | 0                                     | NA                         | 0                                                                | 0                                                       | NA                         |
| Duration of hospitalization due to COVID-19, mean (SD), days            | 10.30 (3.07)                                  | 12.01 (4.71)                          | <0.0001                    | 9.77 (2.46)                                                      | 8.49 (4.19)                                             | 0.0114                     |

|                                                            |            |            |                     |            |           |                     |
|------------------------------------------------------------|------------|------------|---------------------|------------|-----------|---------------------|
| Patients discharged, n (%)<br>Up to Day 14                 | 273 (91.9) | 206 (74.9) | <0.0001             | 168 (94.9) | 74 (86.0) | 0.0128              |
| Patients receiving other<br>therapies, n (%)<br>Remdesivir | 48 (16.2)  | 106 (38.5) | <0.0001             | 34 (19.2)  | 25 (29.1) | 0.0721              |
| Patients with all-cause<br>mortality, n (%)                | 0          | 1 (0.4)    | 0.4808 <sup>b</sup> | 0          | 1 (1.2)   | 0.3270 <sup>b</sup> |

<sup>a</sup>P-value is derived from Student t-test for continuous variables and chi-squared test or Fisher exact test for categorical variables.

<sup>b</sup>P-value derived from Fisher exact test; chi-squared test may not be valid because 25% or 50% of the cells have expected counts <5.

COVID-19, coronavirus disease 2019; SD, standard deviation; SoC, standard of care; NA, not applicable; SpO<sub>2</sub>, peripheral oxygen saturation.
